# Supplementary material for: Ni activated Mo2C by regulating the interfacial electronic structure for highly efficient lithium-ion storage
Source: Royal Society of Chemistry journal article supplement (doi:10.1039/d2nr03832c), 2022-01-01
Supplement: d2nr03832c1.pdf [file d2nr03832c1.pdf]

## Ni activated Mo<sub>2</sub>C by regulating the interfacial electronic structure for highly efficient lithium-ion storage

Donglei Guo<sup>a,1</sup>, Mengke Yang<sup>a,b,1</sup>, Shu Xu<sup>a</sup>, Shuping Zhu<sup>a</sup>, Guilong Liu<sup>a</sup>, Naiteng Wu<sup>a</sup>,  
Ang Cao<sup>c</sup>, Hongyu Mi<sup>b,\*</sup> and Xianming Liu<sup>a,\*</sup>

<sup>a</sup> Key Laboratory of Function-oriented Porous Materials, College of Chemistry and Chemical Engineering, Luoyang Normal University, Luoyang, 471934, P. R. China.

\*Email: myclxm@163.com

<sup>b</sup> State Key Laboratory of Chemistry and Utilization of Carbon Based Energy Resources, School of Chemical Engineering and Technology, Xinjiang University, Urumqi, 830046, P. R. China.

\*Email: mmihongyu@163.com

<sup>c</sup> Department of Physics, Technical University of Denmark, Lyngby 2800, Denmark.

<sup>1</sup>These authors contributed equally.

## Experimental Section

**Characterizations:** The phase compositions of as-prepared samples were determined by the X-ray diffraction (XRD). The structure and morphologies were characterized by the field-emission scanning electron microscope (FESEM, Sigma 500) and a H-8100 transmission electron microscopy (TEM). The energy dispersive spectrometer (EDS) and element maps were taken on a Sigma 500 FESEM unit. The Raman spectra were collected on an Invia Raman spectrometer with the excitation laser wave-length of 633 nm. The electronic conductivity of the samples was achieved by the resistivity tester (ST2253y). The X-ray photoelectron spectra (XPS) was recorded on an ESCALAB 250 spectrometer (Perkin-Elmer). The specific surface areas were calculated using a standard Brunauer-Emmett-Teller (BET) method on a Belsorp-max surface area detecting instrument.

**Electrochemical measurements:** The assembly of CR2032 coin cells was carried in an argon-filled glove box with water and oxygen contents below 0.5 ppm. The active materials (80%), conductive carbon black (10%), and polyvinylidene fluoride (PVDF, 10%) were mixed and ground in a mortar. N-Methyl-2-pyrrolidone (NMP) was used as the solvent to make homogeneous slurry. Then, the as-resultant slurry was uniformly pasted on Cu foil current collector and dried in vacuum oven at 80 °C for 12 h and then 120 °C for another 12 h as the working electrode. Lithium metal foil as counter electrode and 1 mol L<sup>-1</sup> LiPF<sub>6</sub> solution with the mixture of EC: DEC: EMC at volume ratio of 1:1:1 as electrolyte. The charge-discharge profiles of the samples were determined by cycling in the potential range of 0.01-3 V at different current rates. Cyclic voltammetry measurements (CV, at different scanning rates) and electrochemical impedance spectroscopy (EIS, in the frequency range from 100,000 to 0.01 Hz) were investigated on a Parstat 4000+ workstation (Princeton Applied Research).

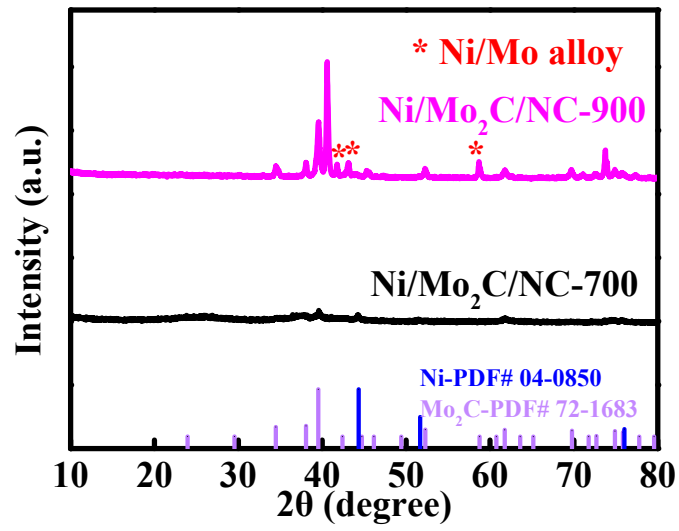

**Fig S1.** XRD patterns of Ni/Mo<sub>2</sub>C/NC-700 and Ni/Mo<sub>2</sub>C/NC-900.

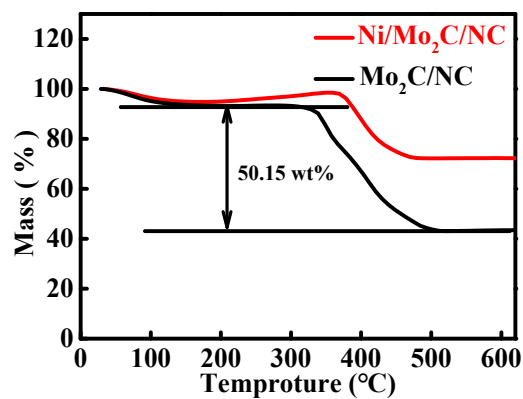

**Fig. S2** TGA curves of Ni/Mo<sub>2</sub>C/NC and Mo<sub>2</sub>C/NC.

The TGA analysis of Ni/Mo<sub>2</sub>C/NC and Mo<sub>2</sub>C/NC was carried out to calculate the carbon content in Ni/Mo<sub>2</sub>C/NC. The Mo<sub>2</sub>C/NC and Ni/Mo<sub>2</sub>C/NC samples were prepared with the same annealed temperature and precursor, just with or without the Ni. The increasing mass of Ni/Mo<sub>2</sub>C/NC is corresponded to the oxidation of Ni and Mo<sub>2</sub>C. The carbon content in Ni/Mo<sub>2</sub>C/NC is determined to be about 62.69 wt%.

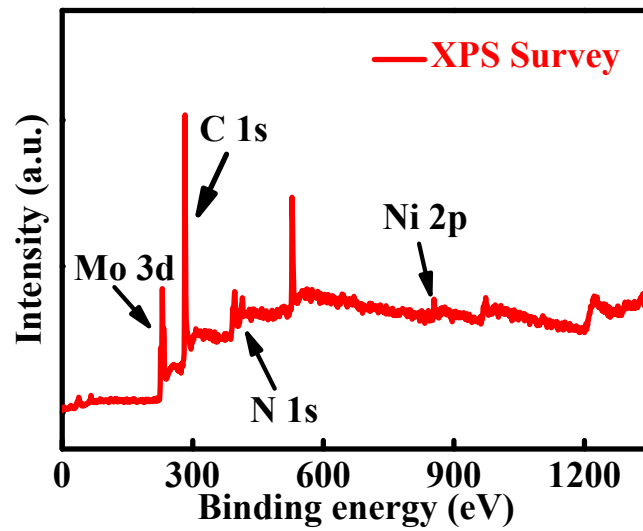

**Fig S3** XPS survey spectrum of Ni/Mo<sub>2</sub>C/NC.

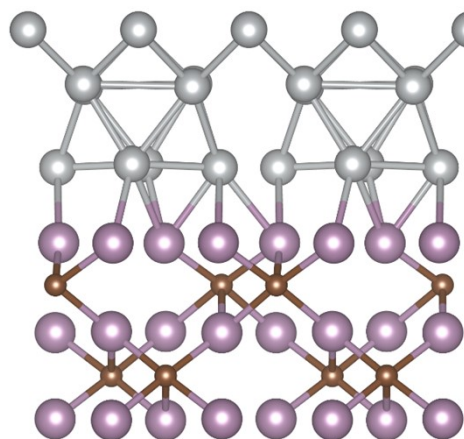

**Fig S4** The optimized model of Ni/Mo<sub>2</sub>C.

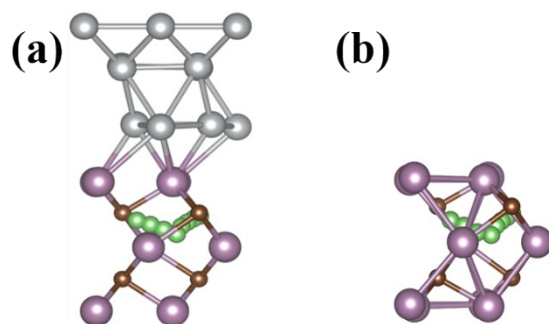

**Fig S5** The migration paths of  $\text{Li}^+$  in  $\text{Ni}/\text{Mo}_2\text{C}$  (a) and  $\text{Mo}_2\text{C}$  (b).

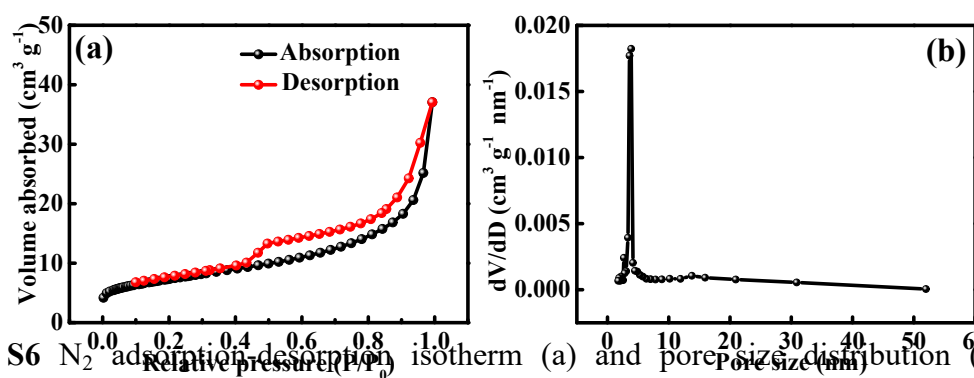

**Fig S6**  $\text{N}_2$  adsorption-desorption isotherm (a) and pore size distribution (b) of  $\text{Ni}/\text{Mo}_2\text{C}/\text{NC}$  according to the NLDFT model.

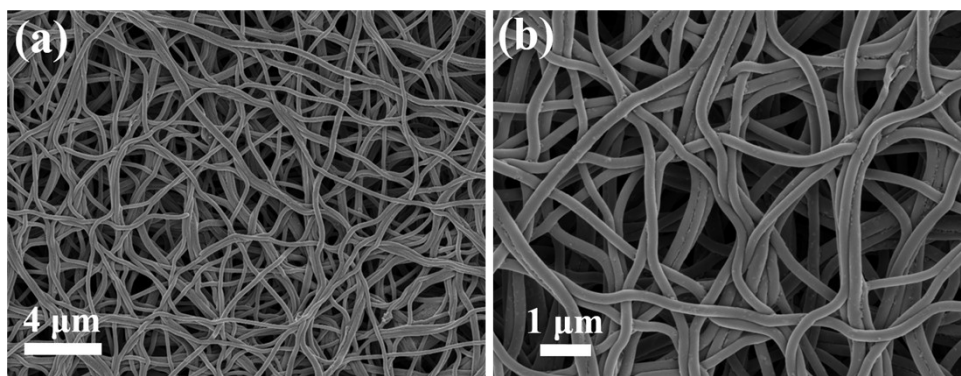

**Fig. S7** FESEM images of Ni-Mo-PAN precursor.



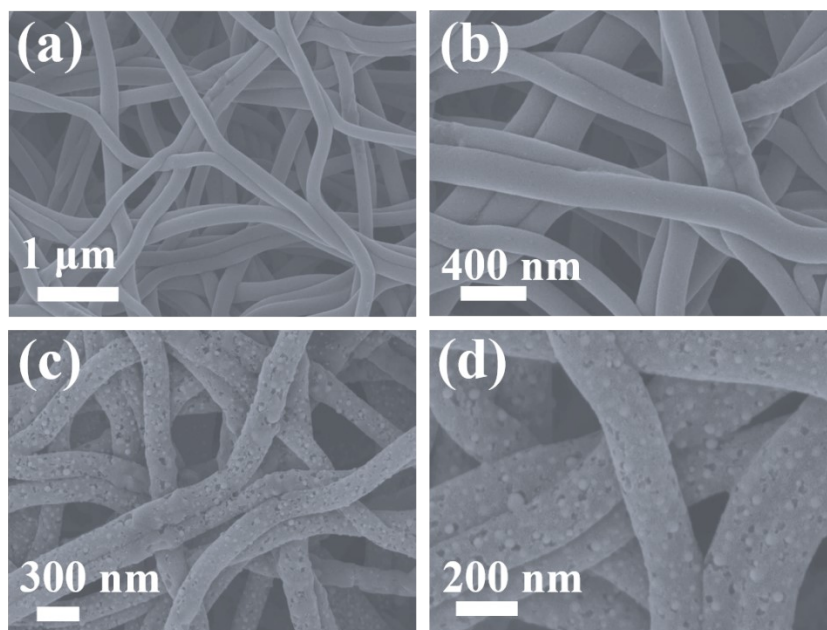

**Fig S8** (a, b) FESEM images of Ni/Mo<sub>2</sub>C/NC-700. (c, d) FESEM images of Ni/Mo<sub>2</sub>C/NC-900.

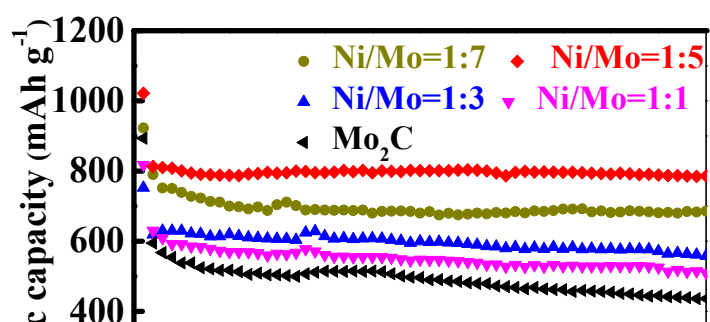

**Fig S9** Comparison of the cyclic performances of Ni/Mo<sub>2</sub>C/NC with different contents of Ni.

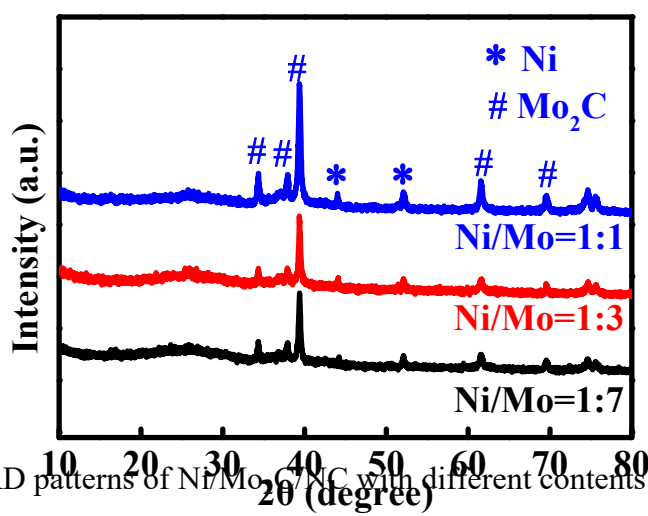

**Fig S10** XRD patterns of Ni/Mo<sub>2</sub>C/NC with different contents of Ni.

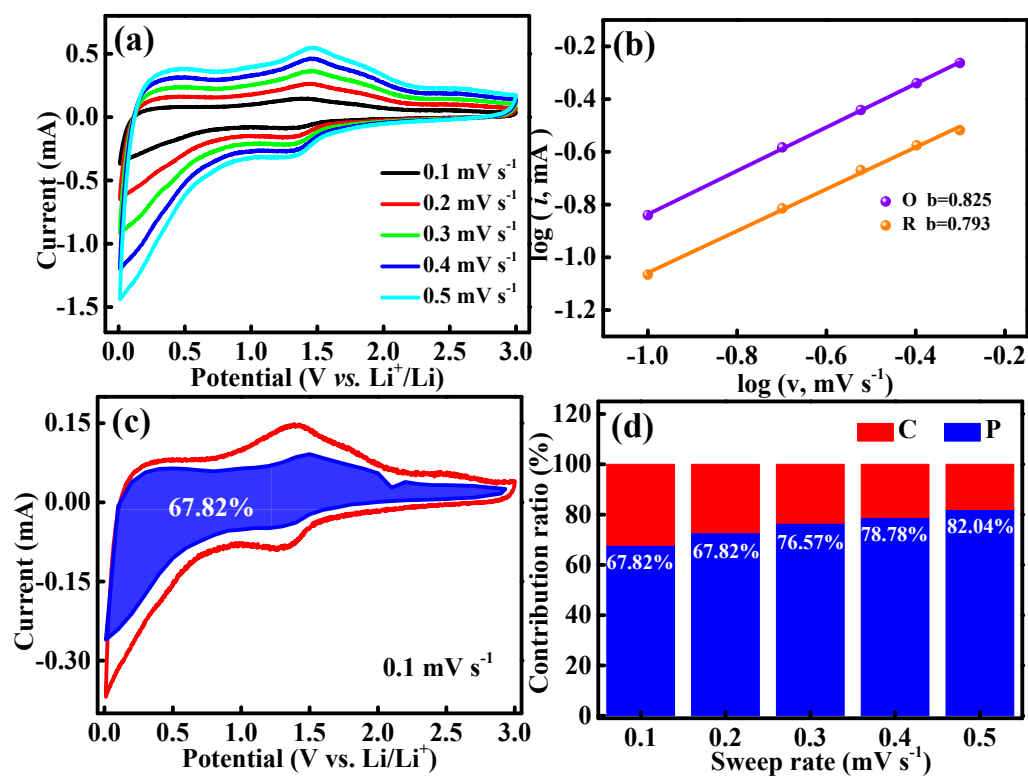

**Fig S11** (a) CV curves of Mo<sub>2</sub>C/NC at different scan rates. (b) Log (i) vs. log (v) plots at each redox peak of Mo<sub>2</sub>C/NC. (c) Capacitive contribution to charge storage of Mo<sub>2</sub>C/NC at a scan rate of 0.1 mV s<sup>-1</sup>. (d) Percentage of capacitance contribution of Mo<sub>2</sub>C/NC at different scan rates.

**Table S1.** Comparison of the electrochemical performance of Ni/Mo<sub>2</sub>C/NC with reported Mo<sub>2</sub>C-based anodes for LIBs.

| Mo <sub>2</sub> C-based materials | Rate capability                                                       | Cyclic performance                                                                 | Ref.  |
|-----------------------------------|-----------------------------------------------------------------------|------------------------------------------------------------------------------------|-------|
|                                   | Current density (A g <sup>-1</sup> )/Capacity (mA h g <sup>-1</sup> ) | Current density (A g <sup>-1</sup> )/Cycle number/Capacity (mA h g <sup>-1</sup> ) |       |
| 3DHP-Mo <sub>2</sub> C            | 3/255.6                                                               | 1/600/481.4                                                                        | [r1]  |
| Mo <sub>2</sub> C/C               | 3/648.1                                                               | 0.75/650/899                                                                       | [r2]  |
| Mo <sub>2</sub> C/C/rGO           | 4/200                                                                 | 0.5/1600/630                                                                       | [r3]  |
| Mo <sub>2</sub> C/C NRs           | 6/100                                                                 | 1/1000/300                                                                         | [r4]  |
| Mo <sub>2</sub> C@CNT             | 16/225                                                                | 1.6/750/878                                                                        | [r5]  |
| Mo <sub>2</sub> C-C               | 2/335.4                                                               | 2/50/308                                                                           | [r6]  |
| Mo <sub>2</sub> C/N-C MHNWs       | 5/486.3                                                               | 2/700/732.9                                                                        | [r7]  |
| Mo <sub>2</sub> C@C-GA            | 5/669.3                                                               | 1/200/804.5                                                                        | [r8]  |
| C@ $\alpha$ -Mo <sub>2</sub> C    | 20/204                                                                | 5/2000/400                                                                         | [r9]  |
| Mo <sub>2</sub> C(52.6%)/GR       | 1.6/310                                                               | 0.1/100/813                                                                        | [r10] |
| HP-Mo <sub>2</sub> C-C            | 10/317                                                                | 0.3/100/873.6                                                                      | [r11] |
| This work                         | 10/344.1                                                              | 2/1800/412.7                                                                       |       |

## References

- [r1] T. Meng, L. R. Zheng, J. W. Qin, D. Zhao and M. H. Cao, *J. Mater. Chem. A*, 2017, **5**, 20228-20238.
- [r2] F. C. Lyu, S. S. Zeng, Z. F. Sun, N. Qin, L. J. Cao, Z. Y. Wang, Z. Jia, S. F. Wu, F. X. Ma, M. C. Li, W. X. Wang, Y. Y. Li, J. Lu and Z. G. Lu, *Small*, 2019, **15**, 1805022.

- [r3] K. K. Halankar, B. P. Mandal, S. Nigam, C. Majumder, A. P. Srivastava, R. Agarwal and A. K. Tyagi, *Energy Fuels*, 2021, **35**, 12556-12568.
- [r4] Z. W. Yang, H. F. Wang, B. S. Cheng, C. Yue, G. Z. Liu, R. T. Zheng, F. Hu and J. Shu, *Energy Technology*, 2020, **8**, 2000189.
- [r5] B. Yu, D. X. Yang, Y. Hu, J. R. He, Y. F. Chen and W. D. He, *Small Methods*, 2018, **3**, 1800287.
- [r6] Q. Gao, X. Y. Zhao, Y. Xiao, D. Zhao and M. H. Cao, *Nanoscale*, 2014, **6**, 6151-6157.
- [r7] L. C. Yang, X. Li, S. N. He, G. H. Du, X. Yu, J. W. Liu, Q. S. Gao, R. Z. Hu and M. Zhu, *J. Mater. Chem. A*, 2016, **4**, 10842-10849.
- [r8] H. L. Xin, Y. Hai, D. Z. Li, Z. Z. Qiu, Y. M. Lin, B. Yang, H. S. Fan and C. Z. Zhu, *Appl. Surf. Sci.*, 2018, **441**, 69-76.
- [r9] F. Hu, Z. M. Liu, C. Yue, J. Xiang and T. Song, *ChemistrySelect*, 2018, **3**, 8395-8401.
- [r10] B. B. Wang, G. Wang and H. Wang, *J. Mater. Chem. A*, 2015, **3**, 17403-17411.
- [r11] Y. Xiao, L. R. Zheng and M. H. Cao, *Nano Energy*, 2015, **12**, 152-160.
